# Supplementary material for: Dietary iron intake and availability are related to maternal education level in overweight/obese adolescents
Source: Springer Nature journal article supplement (doi:10.1007/s00394-017-1501-4), 2017-07-12
Supplement: MOESM1 [file 13298448]

**Approached**

*n* 628

Returned signed informed consent and completed questionnaire

*n* 275

Not eligible:

Weight or eating habits had changed within previous 1 month or planned to change diet within next 2 months (*n* 16)

Measured weight and height

*n* 259

Not eligible:

Underweight (*n* 7)

**Eligible**

NW

*n* 121

**Eligible**

OW/OB

*n* 131

Excluded:

Data collection incomplete

(*n* 9)

Excluded:

Data collection incomplete

(*n* 17)

Completeddata collection

NW

*n* 104

Completed data collection

OW/OB

*n* 122

Excluded:

Under-reported intake

(*n* 2)

Excluded:

Under-reported intake

(*n* 1)

**Included in analysis**

OW/OB

*n* 121

**Included in analysis**

NW

*n* 102

**Online Resource 1.** Numbers of participants approached, eligible and included in data analysis
